# Supplementary material for: CTLA-4-expressing ILC3s restrain interleukin-23-mediated inflammation
Source: Springer Nature journal article supplement (doi:10.1038/s41586-024-07537-3), 2024-06-12
Supplement: MOESM6 [file 41586_2024_7537_MOESM6_ESM.xlsx]

## Sheet: Fig. 3a
	Percentage of CTLA-4 expression in different immune cells of Ncr1cre Ctla4f/f mice relative to Ctla4f/f littermates
				ILC3s	CD4 T	Tregs	γδ T	TH 17
				3.75	98.6	99.2	96	88
				8.3	99	103	95	93
				3.03	104	98.9	99	92
				4.04	103	94	101	89
				1.32	94	96	93	102

## Sheet: Fig. 3b
	Fecal bacterial load at day 5 and 10 post infection (n = 8 mice)
		Ctla4f/f								Ncr1cre Ctla4f/f
	Day 5	433333	900000	736000	1526000	2180000	841000	920000	1120000	2000000	2000000	400000	1400000	300000	2000000	324000	620000
	Day 10	4100000000	7400000000	400000000	400000000	910000000	710000000	4100000000	310000000	300000000	190000000	2400000000	340000000	460000000	810000000	3100000000	610000000

## Sheet: Fig. 3c
		Frequency of ILC3s in large intestine at day 14 post C. rodentium infection
				Ctla4f/f	Ncr1cre Ctla4f/f
				25.5	20.2
				25.4	21.5
				28.8	24
				24	28
				20.5	20
				19.4	20.8
				21	16
				26	18

## Sheet: Fig. 3d
	Frequency of IL-22+ ILC3s in large intestine at day 14 post C. rodentium infection
				Ctla4f/f	Ncr1creCtla4f/f
				29.3	15.9
				28.6	17.6
				21.4	18.1
				22	20.2
				23	28.4
				15	29
				20.2	23
				19	14

## Sheet: Fig. 3e
		Frequency of Tregs in large intestine at day 14 post C. rodentium infection
				Ctla4f/f	Ncr1cre Ctla4f/f
				10.8	7.8
				13.8	9.2
				11	4.9
				8.7	6.8
				17.4	10
				11.7	6.6
				12.3	6.2
				18	11.8

## Sheet: Fig. 3f
	Frequency of IL-17A+ IFNγ+ cell frequency among CD4+ T cells in LI at day 14 post C. rodentium infection
				Ctla4f/f	Ncr1cre Ctla4f/f
				4	24
				10	11
				13	15.8
				3	11
				9	9
				9	12
				8	20
				13	14

## Sheet: Fig. 3g
	Frequency of neutrophils in large intestine at day 14 post C. rodentium infection
				Ctla4f/f	Ncr1cre Ctla4f/f
				17.1	24
				9.2	22.4
				7.2	9.5
				4.76	10.2
				6.3	21.5
				3.75	14.4
				6.7	22.7
				8.2	18.9

## Sheet: Fig. 3h
			Colon length at day 14 post C. rodentium infection
				Ctla4f/f	Ncr1cre Ctla4f/f
				8.5	7.1
				8.6	7.3
				8.9	6.6
				8.2	6.2
				8.7	8.2

## Sheet: Fig. 3I
		Histopathology scores of LI at day 14 post C. rodentium infection
				Ctla4f/f	Ncr1cre Ctla4f/f
				6	15
				9	14
				7	13
				5.5	9
				6.87	12.75

## Sheet: Fig. 3J
		Weight loss at indicated days post naïve T cell transfer
		Days	Rag1-/- Ctla4f/f				Rag1-/- RORγcre Ctla4f/f
		0	100	100	100	100	100	100	100	100
		3	98.9641	109.17	108	101	98.3975	102.434	107.23	104.39
		7	83.4081	95.6332	93.24	97.33	83.682	97.1698	89.25	91.23
		10	92.0628	97.3799	88.1	91.26	77.4059	83.6792	83.44	85.35

[truncated: 5 more sheets: Fig. 3k, Fig 3l, Fig. 3m, Fig. 3n, 3o]
