# Supplementary material for: CTLA-4-expressing ILC3s restrain interleukin-23-mediated inflammation
Source: Springer Nature journal article supplement (doi:10.1038/s41586-024-07537-3), 2024-06-12
Supplement: MOESM8 [file 41586_2024_7537_MOESM8_ESM.xlsx]

## Sheet: Fig 5a
	CTLA-4+ ILC3 frequency (percentage of total ILC3s) from human tonsils stimulated with or without recombinant human IL-23
					without IL-23	with IL-23
					2.26	15.7
					2.61	11
					1.3	11.4
					3.4	21
					1.6	7.8
					1.44	17.5

## Sheet: Fig. 5c
F
	CTLA-4+ ILC3 frequency in intestinal biopsies (n = 20 non-IBD human controls; n = 20 human patients with CD)
					Healthy	IBD
					6.42	21.1
					0.86	7.27
					6.06	13.2
					2.8	9
					2.3	5.56
					3.4	8.67
					10.1	17.7
					2.5	20
					0.8	11.1
					3.85	10
					2.22	2.46
					1.09	10.8
					0.29	6.88
					2.36	8.33
					3.87	4.83
					1.9	4.85
					4.1	9.38
					1.6	4.8
					0.7	1.3
					6.7	4.9

## Sheet: Fig. 5d
	Frequencies of CTLA-4+ ILC3s and free PD-L1+ myeloid cells (n = 20 non-IBD human controls; n = 20 human patients with CD)
					CTLA-4+ ILC3s	Free-PDL1+
				Healthy	6.42	4.8
				Healthy	0.86	3.11
				Healthy	6.06	0.9
				Healthy	2.8	1.9
				Healthy	2.3	3.95
				Healthy	3.4	4.3
				Healthy	10.1	18.7
				Healthy	2.5	3.8
				Healthy	0.8	1.3
				Healthy	3.85	4.8
				Healthy	2.22	1.1
				Healthy	1.09	9.6
				Healthy	0.29	4.8
				Healthy	2.36	21.6
				Healthy	3.87	25.8
				Healthy	1.9	5.21
				Healthy	4.1	14
				Healthy	1.6	14
				Healthy	0.7	9
				Healthy	6.7	5.1
				Diseased	21.1	30
				Diseased	7.27	8.2
				Diseased	13.2	17.6
				Diseased	9	18.9
				Diseased	5.56	4.6
				Diseased	8.67	13.7
				Diseased	17.7	21
				Diseased	20	29.3
				Diseased	11.1	3.17
				Diseased	10	16.3
				Diseased	2.46	2.5
				Diseased	10.8	28.6
				Diseased	6.88	6.1
				Diseased	8.33	25.2
				Diseased	4.83	16.9
				Diseased	4.85	19.6
				Diseased	9.38	26
				Diseased	4.8	35
				Diseased	1.3	1.3
				Diseased	4.9	24

## Sheet: Fig. 5e
	Frequencies of Tregs and free PD-L1+ myeloid cells (n = 20 non-IBD human controls; n = 20 human patients with CD)
					Tregs	Free-PD-L1
				Healthy	1.3	3.95
				Healthy	2.39	4.3
				Healthy	7.17	18.7
				Healthy	2.63	3.8
				Healthy	0.38	1.3
				Healthy	4.3	4.8
				Healthy	2.5	1.1
				Healthy	3.77	9.6
				Healthy	1.9	4.8
				Healthy	3.3	21.6
				Healthy	3.4	25.8
				Healthy	0.9	5.21
				Healthy	1.6	14
				Healthy	2.9	14
				Healthy	1.6	9
				Healthy	0.6	5.1
				Diseased	6.49	30
				Diseased	7.76	8.2
				Diseased	9.69	17.6
				Diseased	20.9	18.9
				Diseased	3.58	4.6
				Diseased	6.25	13.7
				Diseased	12.8	21
				Diseased	11.86	29.3
				Diseased	3.05	3.17
				Diseased	5.04	16.3
				Diseased	1.15	2.5
				Diseased	3.89	28.6
				Diseased	10.4	6.1
				Diseased	6.26	25.2
				Diseased	8.4	16.9
				Diseased	5.68	19.6
				Diseased	7.41	26
				Diseased	5.68	35
				Diseased	5.3	1.3
				Diseased	7.41	24

## Sheet: Fig. 5f
	ILC3 frequency in intestinal biopsies (n = 20 non-IBD human controls; n = 20 human patients with CD)
					Healthy	IBD
					0.205854	0.183024
					0.360152	0.228571
					0.669732	0.244388
					0.389927	0.402004
					0.373351	0.362874
					0.280215	0.220597
					0.446622	0.294019
					0.149048	0.155079
					0.227413	0.225493
					0.69317	0.397878
					0.83023	0.214107
					0.590189	0.314363
					0.748389	0.0875107
					0.394875	0.0444173
					0.270921	0.295758
					0.496309	0.57158
					0.511976	0.15843
					0.472668	0.0796229
					0.258069	0.147696
					0.592556	0.412979
